# Supplementary material for: Combining RNA-seq and proteomic profiling to identify seminal fluid proteins in the migratory grasshopper Melanoplus sanguinipes (F)
Source: PubMed Central journal article supplement (PMC4689059; doi:10.1186/s12864-015-2327-1), 2015-12-22

Figure S1.

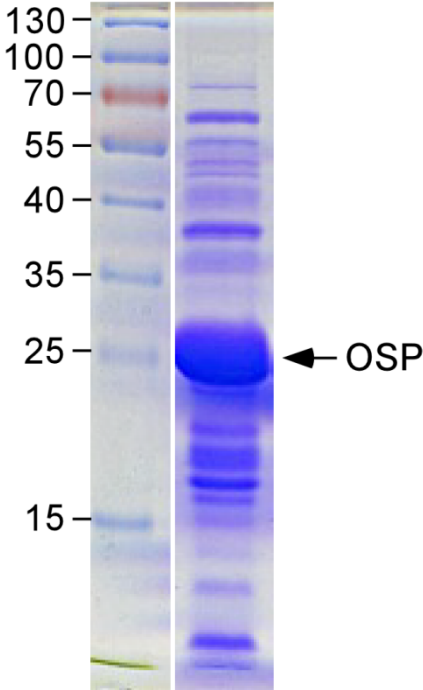

Supplement: 12864_2015_2327_MOESM1_ESM.pdf [file 12864_2015_2327_MOESM1_ESM.pdf]
